# Supplementary material for: Electronic, magnetic and optical properties of MnPX3 (X = S, Se) monolayers with and without chalcogen defects: a first-principles study
Source: Royal Society of Chemistry journal article supplement (doi:10.1039/c9ra09030d), 2020-01-01
Supplement: c9ra09030d2.pdf [file c9ra09030d2.pdf]

# Journal Name

ARTICLE TYPE

## Supplementary Information for

Electronic, magnetic and optical properties of  $\text{MnPX}_3$  ( $X = \text{S}, \text{Se}$ ) monolayers with and without chalcogen defects: A first-principle study

Juntao Yang,<sup>a,b</sup> Yong Zhou,<sup>a</sup> Qilin Guo,<sup>a</sup> Yuriy Dedkov,<sup>a,‡</sup> and Elena Voloshina<sup>a,c,‡</sup>

<sup>a</sup> Department of Physics, Shanghai University, 99 Shangda Road, 200444 Shanghai, P. R. China

<sup>b</sup> School of Science, Hubei University of Automotive Technology, 167 Checheng West Road, Shiyan City, 442002 Hubei, P. R. China

<sup>c</sup> Institute of Physical and Organic Chemistry, Southern Federal University, 344090 Rostov on Don, Russia

‡ Corresponding authors. E-mails: dedkov@shu.edu.cn, voloshina@shu.edu.cn

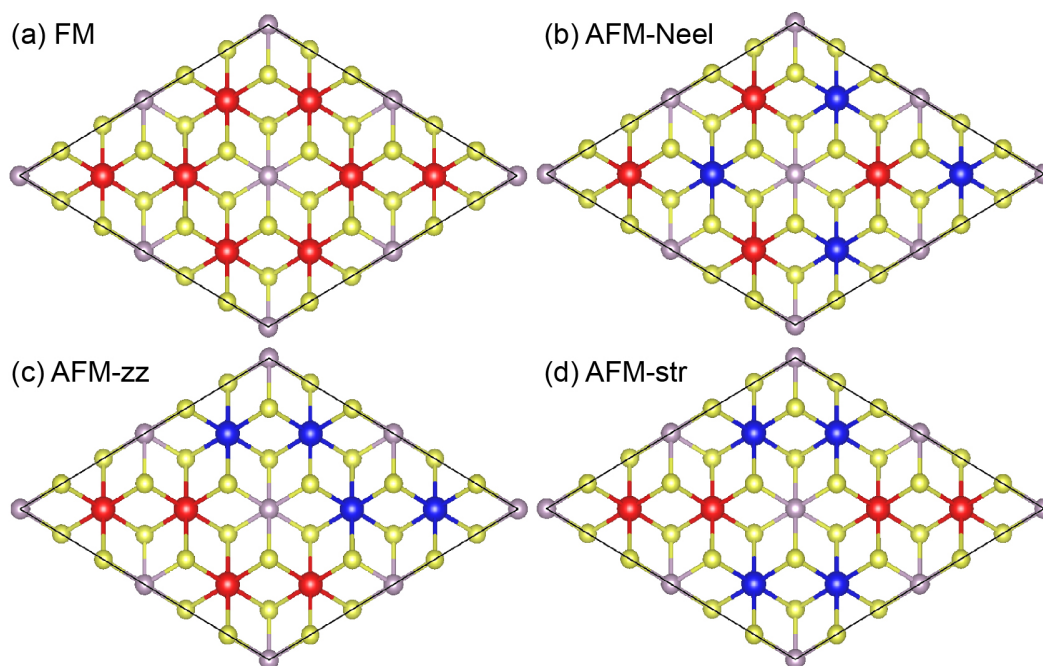

**Fig. S1.** Four different magnetic configurations of  $\text{MnPX}_3$ : (a) FM, (b) AFM-Néel, (c) AFM-zig-zag, and (d) AFM-stripy. Up and down spin moments orientations for Mn ions are coded by red and blue spheres, respectively.

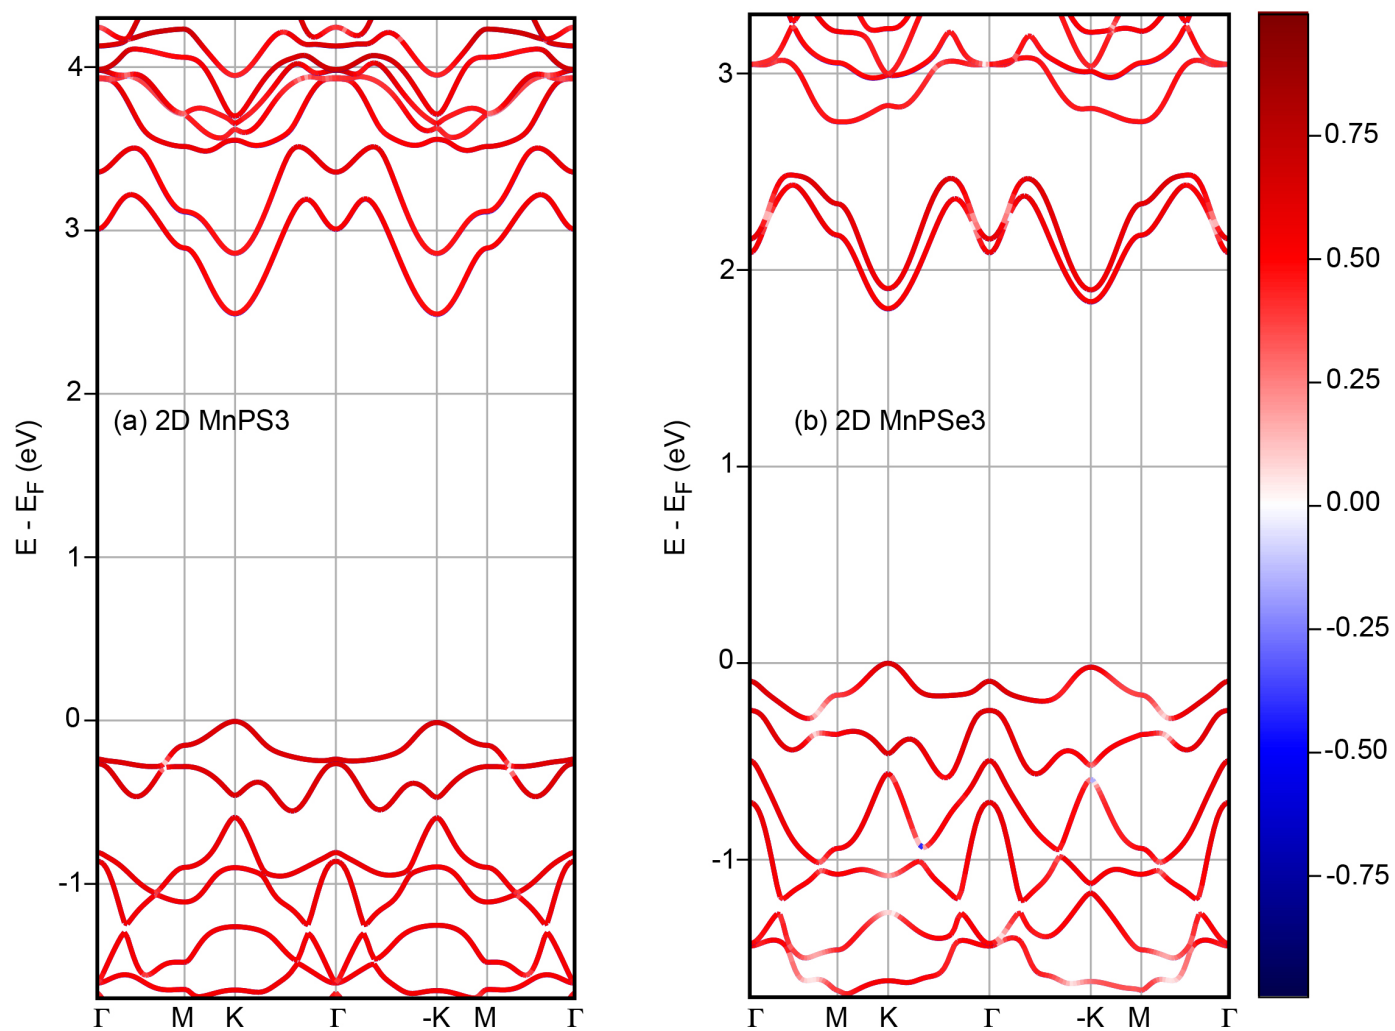

**Fig. S2.** Band structures of (a) 2D MnPS<sub>3</sub> and (b) 2D MnPSe<sub>3</sub> with SOC taken into account. The red and blue colors denote the spin up and down states, respectively.

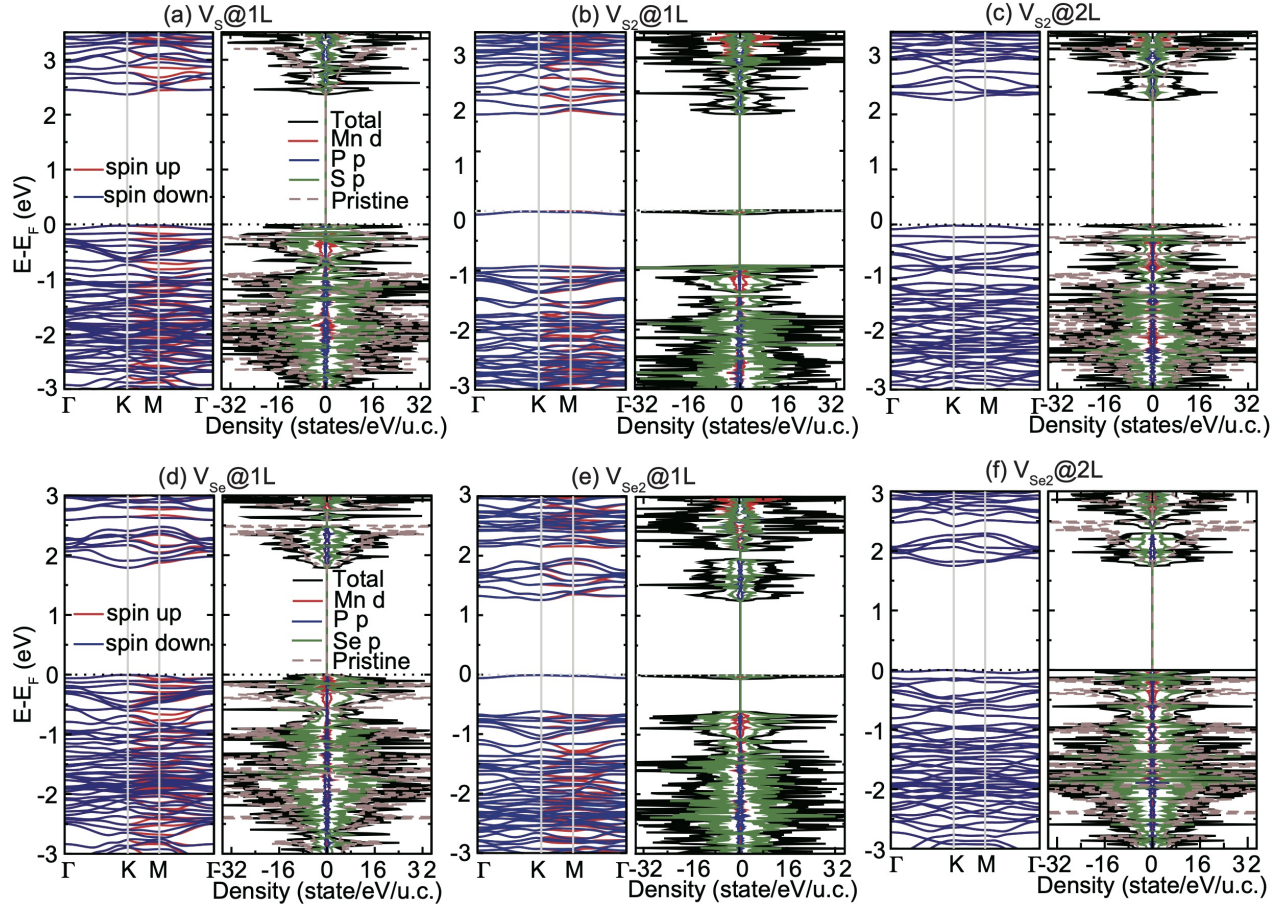

**Fig. S3.** Band structures, total and partial DOS for 2D MnPS<sub>3</sub> (upper panels) and 2D MnPSe<sub>3</sub> (lower panels) vacancy systems.

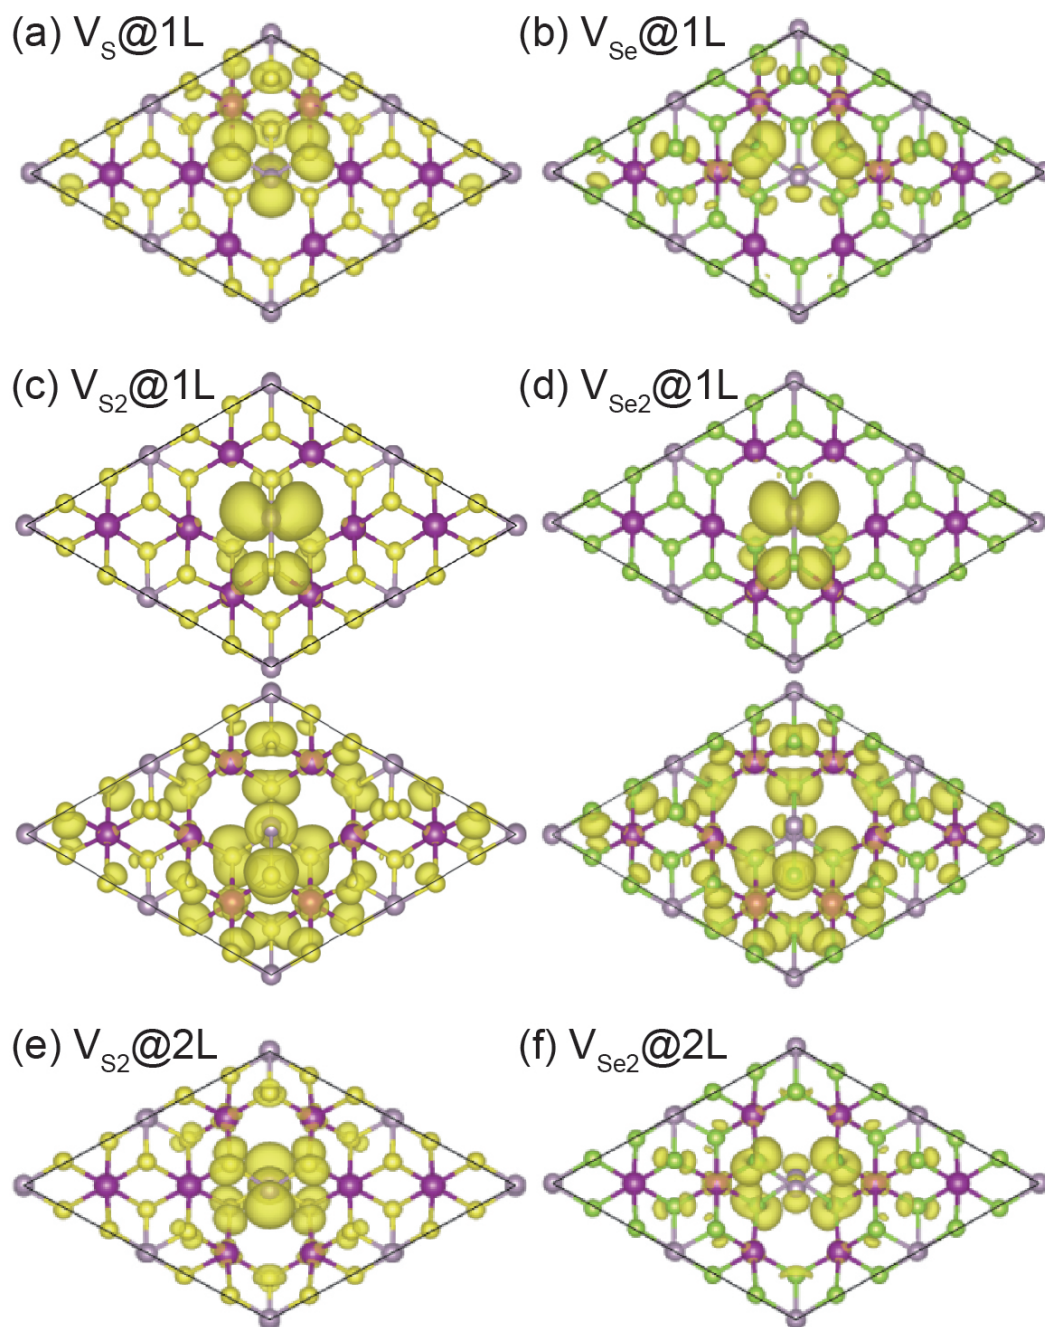

**Fig. S4.** Partial charge densities (iso-surface value =  $2 \times 10^{-3} e/\text{\AA}^3$ ) of 2D MnPS<sub>3</sub> (left panels) and 2D MnPSe<sub>3</sub> (right panels) vacancy systems.
